# Supplementary material for: A general computational design strategy for stabilizing viral class I fusion proteins
Source: PubMed Central journal article supplement (PMC10864359; doi:10.1038/s41467-024-45480-z), 2024-02-13
Supplement: 41467_2024_45480_MOESM3_ESM.pdf [file 41467_2024_45480_MOESM3_ESM.pdf]

## Description of Additional Supplementary Files

**File Name:** Supplementary Data 1

**Description:** **Computed energetic information of the RSV F protein.** The in silico energetic analysis was carried out with the Rosetta software suite and guided the selection of mutations for experimental validation.

**File Name:** Supplementary Data 2

**Description:** **Computed energetic information of the hMPV F protein.** The in silico energetic analysis was carried out with the Rosetta software suite and guided the selection of mutations for experimental validation.

**File Name:** Supplementary Data 3

**Description:** **Computed energetic information of the SARS-CoV-2 S protein.** The in silico energetic analysis was carried out with the Rosetta software suite and guided the selection of mutations for experimental validation.
